# Supplementary material for: Tracheal tuft cells release ATP and link innate to adaptive immunity in pneumonia
Source: PubMed Central journal article supplement (PMC11724094; doi:10.1038/s41467-025-55936-5), 2025-01-10
Supplement: 41467_2025_55936_MOESM2_ESM.pdf [file 41467_2025_55936_MOESM2_ESM.pdf]

## Reporting Summary

Nature Portfolio wishes to improve the reproducibility of the work that we publish. This form provides structure for consistency and transparency in reporting. For further information on Nature Portfolio policies, see our [Editorial Policies](#) and the [Editorial Policy Checklist](#).

### Statistics

For all statistical analyses, confirm that the following items are present in the figure legend, table legend, main text, or Methods section.

n/a Confirmed

- The exact sample size ( $n$ ) for each experimental group/condition, given as a discrete number and unit of measurement
- A statement on whether measurements were taken from distinct samples or whether the same sample was measured repeatedly
- The statistical test(s) used AND whether they are one- or two-sided  
*Only common tests should be described solely by name; describe more complex techniques in the Methods section.*
- A description of all covariates tested
- A description of any assumptions or corrections, such as tests of normality and adjustment for multiple comparisons
- A full description of the statistical parameters including central tendency (e.g. means) or other basic estimates (e.g. regression coefficient) AND variation (e.g. standard deviation) or associated estimates of uncertainty (e.g. confidence intervals)
- For null hypothesis testing, the test statistic (e.g.  $F$ ,  $t$ ,  $r$ ) with confidence intervals, effect sizes, degrees of freedom and  $P$  value noted  
*Give  $P$  values as exact values whenever suitable.*
- For Bayesian analysis, information on the choice of priors and Markov chain Monte Carlo settings
- For hierarchical and complex designs, identification of the appropriate level for tests and full reporting of outcomes
- Estimates of effect sizes (e.g. Cohen's  $d$ , Pearson's  $r$ ), indicating how they were calculated

*Our web collection on [statistics for biologists](#) contains articles on many of the points above.*

### Software and code

Policy information about [availability of computer code](#)

Data collection

NIS-Elements version AR 5.10.01 (Nikon Instruments), FlexAnalysis® software version 3.4 (Bruker Daltonics), Zen pro version 2.3 (Zeiss), Patchmaster version v2x90.3 (HEKA), Kaleido 2.0 (Perkin Elmer), LabChart version 8 (ADInstruments), LAS v3.7.0 (Leica Application Suite), FACSuite™ Software version 1.0.6.5230 (BD), NucleoView NC-200 version 1.3.0.0 (Chemomatec), CFX Manager version 3.1 (Bio-Rad), Milliplex Analyst version 3.5 (Merck Millipore)

Data analysis

FlexAnalysis® software version 3.4 (Bruker Daltonics), Igor Pro version 8.0.4.2 (WaveMetrics), FlowJo version 10.9.0 (BD Biosciences), Microsoft Office 2013, GraphPad Prism 10.2.2 (GraphPad software Inc.), ImageJ 1.52a (NIH), Image Lab 4.0.1 (Bio-Rad)

For manuscripts utilizing custom algorithms or software that are central to the research but not yet described in published literature, software must be made available to editors and reviewers. We strongly encourage code deposition in a community repository (e.g. GitHub). See the Nature Portfolio [guidelines for submitting code & software](#) for further information.

## Data

Policy information about [availability of data](#)

All manuscripts must include a [data availability statement](#). This statement should provide the following information, where applicable:

- Accession codes, unique identifiers, or web links for publicly available datasets
- A description of any restrictions on data availability
- For clinical datasets or third party data, please ensure that the statement adheres to our [policy](#)

The data generated in this study are included in the Source Data file, which is provided with this paper.

## Research involving human participants, their data, or biological material

Policy information about studies with [human participants or human data](#). See also policy information about [sex, gender \(identity/presentation\), and sexual orientation](#) and [race, ethnicity and racism](#).

|                                                                    |     |
|--------------------------------------------------------------------|-----|
| Reporting on sex and gender                                        | n/a |
| Reporting on race, ethnicity, or other socially relevant groupings | n/a |
| Population characteristics                                         | n/a |
| Recruitment                                                        | n/a |
| Ethics oversight                                                   | n/a |

Note that full information on the approval of the study protocol must also be provided in the manuscript.

## Field-specific reporting

Please select the one below that is the best fit for your research. If you are not sure, read the appropriate sections before making your selection.

- Life sciences       Behavioural & social sciences       Ecological, evolutionary & environmental sciences

For a reference copy of the document with all sections, see [nature.com/documents/nr-reporting-summary-flat.pdf](https://www.nature.com/documents/nr-reporting-summary-flat.pdf)

## Life sciences study design

All studies must disclose on these points even when the disclosure is negative.

|                 |                                                                                                                                                                                                                                                                                                                                                |
|-----------------|------------------------------------------------------------------------------------------------------------------------------------------------------------------------------------------------------------------------------------------------------------------------------------------------------------------------------------------------|
| Sample size     | Sample size was estimated using PASS 2019 software in consultation with statisticians affiliated with our university.                                                                                                                                                                                                                          |
| Data exclusions | All data were included, except for values identified as statistical outliers using the Grubbs test.                                                                                                                                                                                                                                            |
| Replication     | Experiments were independently reproduced at least three times to assess reproducibility.                                                                                                                                                                                                                                                      |
| Randomization   | Allocation was random, as mice, cells and samples were selected randomly.                                                                                                                                                                                                                                                                      |
| Blinding        | During in vivo experiments and those involving freshly isolated epithelial or tuft cells, mouse information was not blinded due to animal protection regulations, which require clear documentation of each mouse from birth to death. However, following sample preparation, data collection and analysis were performed in a blinded manner. |

## Behavioural & social sciences study design

All studies must disclose on these points even when the disclosure is negative.

|                   |     |
|-------------------|-----|
| Study description | n/a |
| Research sample   | n/a |
| Sampling strategy | n/a |
| Data collection   | n/a |
| Timing            | n/a |

|                   |     |
|-------------------|-----|
| Data exclusions   | n/a |
| Non-participation | n/a |
| Randomization     | n/a |

## Ecological, evolutionary & environmental sciences study design

All studies must disclose on these points even when the disclosure is negative.

|                          |     |
|--------------------------|-----|
| Study description        | n/a |
| Research sample          | n/a |
| Sampling strategy        | n/a |
| Data collection          | n/a |
| Timing and spatial scale | n/a |
| Data exclusions          | n/a |
| Reproducibility          | n/a |
| Randomization            | n/a |
| Blinding                 | n/a |

Did the study involve field work?  Yes  No

## Field work, collection and transport

|                        |     |
|------------------------|-----|
| Field conditions       | n/a |
| Location               | n/a |
| Access & import/export | n/a |
| Disturbance            | n/a |

## Reporting for specific materials, systems and methods

We require information from authors about some types of materials, experimental systems and methods used in many studies. Here, indicate whether each material, system or method listed is relevant to your study. If you are not sure if a list item applies to your research, read the appropriate section before selecting a response.

### Materials & experimental systems

| n/a                                 | Included in the study                                           |
|-------------------------------------|-----------------------------------------------------------------|
| <input type="checkbox"/>            | <input checked="" type="checkbox"/> Antibodies                  |
| <input type="checkbox"/>            | <input checked="" type="checkbox"/> Eukaryotic cell lines       |
| <input checked="" type="checkbox"/> | <input type="checkbox"/> Palaeontology and archaeology          |
| <input type="checkbox"/>            | <input checked="" type="checkbox"/> Animals and other organisms |
| <input checked="" type="checkbox"/> | <input type="checkbox"/> Clinical data                          |
| <input checked="" type="checkbox"/> | <input type="checkbox"/> Dual use research of concern           |
| <input checked="" type="checkbox"/> | <input type="checkbox"/> Plants                                 |

### Methods

| n/a                                 | Included in the study                              |
|-------------------------------------|----------------------------------------------------|
| <input checked="" type="checkbox"/> | <input type="checkbox"/> ChIP-seq                  |
| <input type="checkbox"/>            | <input checked="" type="checkbox"/> Flow cytometry |
| <input checked="" type="checkbox"/> | <input type="checkbox"/> MRI-based neuroimaging    |

## Antibodies

Antibodies used

1. Pannexin 1 (dilution: 1:200, host: rabbit, Alomone labs, Cat.No. ACC-234, polyclonal)
2. Trpm5 (dilution 1:800, host: rabbit, created in-house (Hollenhorst et al. 2020))
3. DCAMKL1 (dilution 1:1600, host: rabbit, abcam, Cat.No. ab31704, Lot: GR335/375-1, polyclonal)

4. ChAT (dilution 1:300, host: goat, Sigma-Aldrich, Cat.No. AB144P, Lot: 2603400, polyclonal)
5. CD11c (dilution 1:800, host: Armenian hamster, eBioscience, Cat.No. 14-0114-82, Clone: N418)
6. donkey anti-rabbit-Cy3 (dilution 1:1000, Merck Millipore, Cat.No. AP182C, Lot: 3382285, polyonal)
7. donkey anti-goat-Cy3 (dilution 1:250, Merck, Cat.No. AP180C, Lot: 2707848, polyclonal)
8. goat anti-armenian-hamster-Cy3 (dilution 1:800, Jackson, Cat.No. 127-165-160, Lot: 137164, polyclonal)
9. donkey anti-rabbit-Cy2 (dilution 1:100, Jackson, Cat.No. 711-255-152, Lot: 156228, polyclonal)
10. ChAT (dilution 1:500, host: rabbit, ThermoFisher, Cat.No. 703789, Lot: 2367073, Clone: 13H9L16)
11. anti-rabbit-HRP (dilution 1:10000, Sigma-Aldrich, Cat.No. 12-348, polyclonal)
12. F4/80-PE-Cy7 (dilution: 1:40, eBioscience, Cat.No. 25-4801-82, Lot: 2279168, Clone: BM8)
13. CD45-PerCP-Cy5.5 (dilution 1:133, eBioscience, Cat.No. 45-0451-82, Lot: 1994158, Clone: 30-F11)
14. CD11b-FITC (dilution 1:40, eBioscience, Cat.No. 11-0112-82, Lot: 2125442, Clone: M1/70)
15. CD86-PE (dilution 1:133, eBioscience, Cat.No. 12-0862-82, Lot: 2045467, Clone: GL1)
16. CD11c-APC-Cy7 (dilution 1:40, BD Biosciences, Cat.No. 561241, Lot: 0352741, Clone: HL3)
17. CCR6-APC (dilution 1:40, BioLegend, Cat.No. 129814, Lot: B339849, Clone: 29-2L17)
18. CD4-FITC (dilution 1:80, eBioscience, Cat.No. 11-0042-82, Lot: 2235746, Clone: RM4-5)
19. LY6G-APC (dilution 1:40, eBioscience, Cat.No. 17-9668-82, Lot: 2183550, Clone: 1A8-Ly6g)
20. IL-17A-PE-Cy7 (dilution 1:40, eBioscience, Cat.No. 25-7177-82, Lot: 2317033, Clone: eBio17B7)
21. F4/80-FITC (dilution 1:50, BioLegend, Cat.No. 123107, Lot: B361743, Clone: BM8)
22. CD11b-Pacific blue (dilution 1:50, BioLegend, Cat.No. 101223, Lot: B350151, Clone: M1/70)
23. Ep-CAM-PE-Cy7 (dilution 1:50, BioLegend, Cat.No. 118215, Lot: B303317, Clone: G8.8)
24. MHCI-PE-Cy7 (dilution 1:333, BioLegend, Cat.No. 107629, Lot: B322006, Clone: N5/114.15.2)
25. CD86-Pacific blue (dilution 1:50, BioLegend, Cat.No. 105022, Lot: B377787, Clone: GL-1)
26. Gnat3 (dilution 1:400, Covalab, Cat.No. pab73402, Lot: 65974, polyclonal)
27. ChAT (dilution 1:400, Sigma-Aldrich, Cat.No. AB144P, Lot: 2603400, polyclonal)
28. GFP (dilution 1:200, Novusbio, Cat.No. NB100-1614, polyclonal)
29. donkey anti-goat-AF647 (dilution 1:400, Millipore, Cat.No. AP180SA6, Lot: 3743391, polyclonal)
30. donkey anti-chicken-FITC (dilution 1:200, Jackson ImmunoResearch, Cat.No. 703-096-155, Lot: 164518, polyclonal)
31. CD16/32 (dilution 1:100, eBioscience, Cat.No. 14-0161-82, Clone : 93)
32. LY6C-APC (dilution 1:40, BioLegend, Cat.No. 128015, Lot: B322022, Clone: HK1.4)
33. CCR7-PE (dilution 1:20, BioLegend, Cat.No. 120105, Lot: B387617, Clone: 4B12)
34. CD3-eFluor450 (dilution 1:40, eBioscience, Cat.No. 48-0032-82, Lot: 1987699, Clone: 17A2)
35. TCR-APC (dilution 1:80, BioLegend, Cat.No. 109211, Lot: B397293, Clone: H57-597)
36. TCRg/d-FITC (dilution 1:50, BioLegend, Cat.No. 118105, Lot: B401688, Clone: GL3)
37. KLRG-BV421 (dilution 1:20, BioLegend, Cat.No. 138414, Lot: B354054, Clone: 2F1/KLRG1)
38. CD45-APC-Cy7 (dilution 1:40, BioLegend, Cat.No. 103116, Lot: B371499, Clone: 30-F11)
39. CD127-PerCP-Cy5.5 (dilution 1:40, BioLegend, Cat.No. 121114, Lot: B321692, Clone: SB/199)
40. T-bet-APC (dilution 1:40, BioLegend, Cat.No. 644814, Lot: B353938, Clone: 4B10)
41. RORgT-PE (dilution 1:50, BD Biosciences, Cat.No. 562607, Lot: 2040776, Clone: Q31-378)
42. CD5-biotin (dilution 1:200, BioLegend, Cat.No. 100604, Lot: B314434, Clone: 53-7.3)
43. CD3-biotin (dilution 1:200, BioLegend, Cat.No. 100304, Lot: B357833, Clone: 145-2C11)
44. GR-1-biotin (dilution 1:200, BioLegend, Cat.No. 108404, Lot: B357272, Clone: RB6-8C5)
45. CD45R-biotin (dilution 1:200, BioLegend, Cat.No. 103203, Lot: B352761, Clone: RA3-6B2)

## Validation

All antibodies used in this study except the Trpm5 antibody are commercially available. Antibodies were purchased from eBioscience, BioLegend, Sigma-Aldrich, Merck, Jackson, Millipore, Merck Millipore, abcam and Alomone labs. All commercial antibodies have been validated as mentioned on the manufacturer's websites listed below. The Trpm5 antibody was validated in tissue from Trpm5-deficient mice (Hollenhorst et al. 2022).

1. <https://www.alomone.com/p/anti-pannexin-1/ACC-234>
3. <https://www.abcam.com/en-de/products/primary-antibodies/dcamk1-antibody-ab31704>
4. <https://www.sigmaaldrich.com/DE/en/product/mm/ab144p>
5. <https://www.thermofisher.com/antibody/product/CD11c-Antibody-clone-N418-Monoclonal/14-0114-82>
6. [https://www.merckmillipore.com/DE/de/product/Donkey-Anti-Rabbit-IgG-Antibody-Cy3-conjugate-Species-Adsorbed,MM\\_NF-AP182C](https://www.merckmillipore.com/DE/de/product/Donkey-Anti-Rabbit-IgG-Antibody-Cy3-conjugate-Species-Adsorbed,MM_NF-AP182C)
7. [https://www.merckmillipore.com/DE/de/product/Donkey-Anti-Goat-IgG-Antibody-Cy3-conjugate-Species-Adsorbed,MM\\_NF-AP180C?referrerURL=https%3A%2F%2Fwww.google.com%2F](https://www.merckmillipore.com/DE/de/product/Donkey-Anti-Goat-IgG-Antibody-Cy3-conjugate-Species-Adsorbed,MM_NF-AP180C?referrerURL=https%3A%2F%2Fwww.google.com%2F)
8. <https://www.jacksonimmuno.com/catalog/products/127-165-160>
9. <https://www.jacksonimmuno.com/catalog/products/711-225-152>
10. <https://www.thermofisher.com/antibody/product/ChAT-Antibody-clone-13H9L16-Recombinant-Monoclonal/703789>
11. <https://www.sigmaaldrich.com/DE/en/product/mm/12348>
12. <https://www.thermofisher.com/antibody/product/F4-80-Antibody-clone-BM8-Monoclonal/25-4801-82>
13. <https://www.thermofisher.com/antibody/product/CD45-Antibody-clone-30-F11-Monoclonal/45-0451-82>
14. <https://www.thermofisher.com/antibody/product/CD11b-Antibody-clone-M1-70-Monoclonal/11-0112-82>
15. <https://www.thermofisher.com/antibody/product/CD86-B7-2-Antibody-clone-GL1-Monoclonal/12-0862-82>
16. <https://www.bdbiosciences.com/en-us/products/reagents/flow-cytometry-reagents/research-reagents/single-color-antibodies-ruo/apc-cy-7-hamster-anti-mouse-cd11c.561241>
17. <https://www.biolegend.com/nl-nl/products/apc-anti-mouse-cd196-ccr6-antibody-6117>
18. <https://www.thermofisher.com/antibody/product/CD4-Antibody-clone-RM4-5-Monoclonal/11-0042-82>

19. <https://www.thermofisher.com/antibody/product/Ly-6G-Antibody-clone-1A8-Ly6g-Monoclonal/17-9668-82>
20. <https://www.thermofisher.com/antibody/product/IL-17A-Antibody-clone-eBio17B7-Monoclonal/25-7177-82>
21. <https://www.biolegend.com/de-de/products/fitc-anti-mouse-f4-80-antibody-4067?GroupID=BLG5319>
22. <https://www.biolegend.com/de-de/products/pacific-blue-anti-mouse-human-cd11b-antibody-3863>
23. <https://www.biolegend.com/de-de/products/pe-cyanine7-anti-mouse-cd326-ep-cam-antibody-5303?GroupID=BLG6455>
24. <https://www.biolegend.com/de-de/products/pe-cyanine7-anti-mouse-i-a-i-e-antibody-6136?GroupID=BLG11931>
25. <https://www.biolegend.com/de-at/products/pacific-blue-anti-mouse-cd86-antibody-3122?GroupID=BLG10719>
26. [https://www.covalab.com/catalog/product/view/\\_ignore\\_category/1/id/304640/s/p21920-gnat3-internal-antibody/](https://www.covalab.com/catalog/product/view/_ignore_category/1/id/304640/s/p21920-gnat3-internal-antibody/)
27. [https://www.sigmaaldrich.com/CY/en/product/mm/ab144p?utm\\_source=google&utm\\_medium=cpc&utm\\_campaign=21473655026&utm\\_content=160056090610&gclid=EAlaIqobChMIIZOK6-XliAMVl2BAh0tkRFuEAAYASAAEgls\\_\\_D\\_BwE](https://www.sigmaaldrich.com/CY/en/product/mm/ab144p?utm_source=google&utm_medium=cpc&utm_campaign=21473655026&utm_content=160056090610&gclid=EAlaIqobChMIIZOK6-XliAMVl2BAh0tkRFuEAAYASAAEgls__D_BwE)
28. [https://www.novusbio.com/products/gfp-antibody\\_nb100-1614](https://www.novusbio.com/products/gfp-antibody_nb100-1614)
29. <https://www.merckmillipore.com/INTL/en/search/AP180SA6?search=&TrackingSearchType=SB+-+Search+Box&SearchContextPageletUUID=&SearchTerm=AP180SA6>
30. <https://www.jacksonimmuno.com/catalog/products/703-096-155>
31. <https://www.thermofisher.com/antibody/product/CD16-CD32-Antibody-clone-93-Monoclonal/14-0161-82>
32. <https://www.biolegend.com/de-de/products/apc-anti-mouse-ly-6c-antibody-6047>
33. <https://www.biolegend.com/en-ie/products/pe-anti-mouse-cd197-ccr7-antibody-2799>
34. <https://www.thermofisher.com/antibody/product/CD3-Antibody-clone-17A2-Monoclonal/48-0032-82>
35. <https://www.biolegend.com/de-de/products/apc-anti-mouse-tcr-beta-chain-antibody-268>
36. <https://www.biolegend.com/nl-be/products/fitc-anti-mouse-tcr-gamma-delta-antibody-2420>
37. <https://www.biolegend.com/en-gb/products/brilliant-violet-421-anti-mouse-human-klrg1-mafa-antibody-7528?GroupID=BLG8908>
38. <https://www.biolegend.com/ja-jp/products/apc-cyanine7-anti-mouse-cd45-antibody-2530?GroupID=BLG1932>
39. <https://punchout.biolegend.com/fr-fr/products/percp-cyanine5-5-anti-mouse-cd127-il-7ralpha-antibody-4517?GroupID=BLG10447>
40. <https://www.biolegend.com/de-at/products/apc-anti-t-bet-antibody-7120?GroupID=BLG6433>
41. <https://www.bdbiosciences.com/en-us/products/reagents/flow-cytometry-reagents/research-reagents/single-color-antibodies-ruo/pe-mouse-anti-mouse-ror-t.562607>
42. <https://www.biolegend.com/en-gb/products/biotin-anti-mouse-cd5-antibody-158>
43. <https://www.biolegend.com/ja-jp/products/biotin-anti-mouse-cd3epsilon-antibody-22>
44. <https://www.biolegend.com/ja-jp/products/biotin-anti-mouse-ly-6g-ly-6c-gr-1-antibody-457>
45. <https://www.biolegend.com/nl-be/products/biotin-anti-mouse-human-cd45r-b220-antibody-444>

## Eukaryotic cell lines

Policy information about [cell lines and Sex and Gender in Research](#)

|                                                                   |                                                     |
|-------------------------------------------------------------------|-----------------------------------------------------|
| Cell line source(s)                                               | HEK293 cells were acquired from ATCC (No. CRL-1573) |
| Authentication                                                    | n/a                                                 |
| Mycoplasma contamination                                          | All cells were regularly tested for mycoplasma.     |
| Commonly misidentified lines (See <a href="#">ICLAC</a> register) | n/a                                                 |

## Palaeontology and Archaeology

|                                                                                                                                                 |     |
|-------------------------------------------------------------------------------------------------------------------------------------------------|-----|
| Specimen provenance                                                                                                                             | n/a |
| Specimen deposition                                                                                                                             | n/a |
| Dating methods                                                                                                                                  | n/a |
| <input type="checkbox"/> Tick this box to confirm that the raw and calibrated dates are available in the paper or in Supplementary Information. |     |
| Ethics oversight                                                                                                                                | n/a |

Note that full information on the approval of the study protocol must also be provided in the manuscript.

## Animals and other research organisms

Policy information about [studies involving animals](#); [ARRIVE guidelines](#) recommended for reporting animal research, and [Sex and Gender in Research](#)

|                    |                                                                                                                                              |
|--------------------|----------------------------------------------------------------------------------------------------------------------------------------------|
| Laboratory animals | Mice of both genders, older than 8 weeks of age, were used from the following genetic lines: Trpm5 <sup>-/-</sup> (Damak et al. 2006), ChAT- |
|--------------------|----------------------------------------------------------------------------------------------------------------------------------------------|

eGFP (Tallini et al. 2006), Trpm5<sup>-/-</sup>/ChAT-eGFP (Tg(RP23-268L19-EGFP)2Mik;Trpm5tm1Dgen(129S5/SvEvBrd-C57BL/6)), Trpm5-DTA (Perniss et al. 2020), Trpm5-DREADD (designer receptors exclusively activated by designer drugs) (Yu et al. 2023), Trpm5-DREADD-tGFP (Yu et al. 2023), Chatfl/flTrpm5cre B6;129-Trpm5tm1.1(cre)Uboe;B6;129-Chattm1Jrs/J, Pannexin1<sup>-/-</sup> (Panx1<sup>-/-</sup>) (Anselmi et al. 2008), Pannexin2<sup>-/-</sup> (Panx2<sup>-/-</sup>) (Bargiotas et al. 2011) and Pannexin1<sup>-/-</sup>/2<sup>-/-</sup> (Panx1<sup>-/-</sup>/2<sup>-/-</sup>) (Bargiotas et al. 2011) as well as wild-type controls. Mice of both genders were included in the experiments, and no gender specific effects were studied.

Wild animals

The study did not involve wild animals.

Reporting on sex

There were no sex-based analyses performed.

Field-collected samples

The study did not involve samples collected from the field.

Ethics oversight

All animal experimental and care procedures were conducted in accordance with the German guidelines for care and use of laboratory animals as well as the ARRIVE guidelines, and were approved by the Animal Welfare Committee of Saarland (approval numbers 04/2018, 40/2018, 09/2021).

Note that full information on the approval of the study protocol must also be provided in the manuscript.

## Clinical data

Policy information about [clinical studies](#)

All manuscripts should comply with the ICMJE [guidelines for publication of clinical research](#) and a completed [CONSORT checklist](#) must be included with all submissions.

Clinical trial registration

n/a

Study protocol

n/a

Data collection

n/a

Outcomes

n/a

## Dual use research of concern

Policy information about [dual use research of concern](#)

### Hazards

Could the accidental, deliberate or reckless misuse of agents or technologies generated in the work, or the application of information presented in the manuscript, pose a threat to:

- | No                                  | Yes                      |                            |
|-------------------------------------|--------------------------|----------------------------|
| <input checked="" type="checkbox"/> | <input type="checkbox"/> | Public health              |
| <input checked="" type="checkbox"/> | <input type="checkbox"/> | National security          |
| <input checked="" type="checkbox"/> | <input type="checkbox"/> | Crops and/or livestock     |
| <input checked="" type="checkbox"/> | <input type="checkbox"/> | Ecosystems                 |
| <input checked="" type="checkbox"/> | <input type="checkbox"/> | Any other significant area |

### Experiments of concern

Does the work involve any of these experiments of concern:

- | No                                  | Yes                      |                                                                             |
|-------------------------------------|--------------------------|-----------------------------------------------------------------------------|
| <input checked="" type="checkbox"/> | <input type="checkbox"/> | Demonstrate how to render a vaccine ineffective                             |
| <input checked="" type="checkbox"/> | <input type="checkbox"/> | Confer resistance to therapeutically useful antibiotics or antiviral agents |
| <input checked="" type="checkbox"/> | <input type="checkbox"/> | Enhance the virulence of a pathogen or render a nonpathogen virulent        |
| <input checked="" type="checkbox"/> | <input type="checkbox"/> | Increase transmissibility of a pathogen                                     |
| <input checked="" type="checkbox"/> | <input type="checkbox"/> | Alter the host range of a pathogen                                          |
| <input checked="" type="checkbox"/> | <input type="checkbox"/> | Enable evasion of diagnostic/detection modalities                           |
| <input checked="" type="checkbox"/> | <input type="checkbox"/> | Enable the weaponization of a biological agent or toxin                     |
| <input checked="" type="checkbox"/> | <input type="checkbox"/> | Any other potentially harmful combination of experiments and agents         |

## Plants

|                       |     |
|-----------------------|-----|
| Seed stocks           | n/a |
| Novel plant genotypes | n/a |
| Authentication        | n/a |

## ChIP-seq

### Data deposition

- Confirm that both raw and final processed data have been deposited in a public database such as [GEO](#).
- Confirm that you have deposited or provided access to graph files (e.g. BED files) for the called peaks.

|                                                             |     |
|-------------------------------------------------------------|-----|
| Data access links<br>May remain private before publication. | n/a |
| Files in database submission                                | n/a |
| Genome browser session<br>(e.g. <a href="#">UCSC</a> )      | n/a |

### Methodology

|                         |     |
|-------------------------|-----|
| Replicates              | n/a |
| Sequencing depth        | n/a |
| Antibodies              | n/a |
| Peak calling parameters | n/a |
| Data quality            | n/a |
| Software                | n/a |

## Flow Cytometry

### Plots

Confirm that:

- The axis labels state the marker and fluorochrome used (e.g. CD4-FITC).
- The axis scales are clearly visible. Include numbers along axes only for bottom left plot of group (a 'group' is an analysis of identical markers).
- All plots are contour plots with outliers or pseudocolor plots.
- A numerical value for number of cells or percentage (with statistics) is provided.

### Methodology

Sample preparation

Lungs, tracheae, bronchoalveolar lavage fluid (BALF) and airways lymph nodes were collected from CNO- or denatonium-treated, *P. aeruginosa*-infected mice or untreated control mice of each mouse strain used, and processed as described previously (Hollenhorst et al, 2022). Briefly, euthanasia (see above), blood samples were collected followed by obtaining BALF through instillation and aspiration of 1 ml of ice-cold DPBS containing 0.1 mM EDTA and 1% fetal bovine serum (FBS) via a tracheal cannula into the lungs. The last step was repeated three times. The mice were then perfused with cold DPBS, and the tracheae, lungs and airway lymph nodes were carefully dissected. For single-cell suspension preparation, tissues were finally cut into small pieces. Lungs were digested for 1 h at 37°C using a solution of collagenase II (1 mg/ml, Gibco) and DNase I (1 µl/ml, Invitrogen) while tracheas were digested for 30 min with solution containing papain (20 U/ml, Sigma-Aldrich), EDTA (1.6 mM, Grüssing), L-Cysteine (25 mM, Sigma-Aldrich) and DNase I (0.5 µl/ml, Invitrogen). Airway lymph nodes were mechanically disrupted without enzymatic digestion. Subsequently, all tissues, except blood, were filtered through a 70 µm cell strainer to obtain single cells (Falcon, BD Biosciences, Heidelberg, Germany). Red blood cells (RBCs) were lysed using RBCs

ACK lysis buffer (Thermo Fisher Scientific). Cell counts and viability were assessed using NucleoCounter® NC-200™ (Chemomatec, Kaiserslautern, Germany). For CNO-treated mice, cell viability was assessed using the Zombie Aqua Fixable Viability Kit (1:100, BioLegend, San Diego, California, USA) following the manufacturer's protocol. Finally, cells were fixed using 1% PFA (or 2% PFA for samples from CNO-treated animals).

|                           |                                                                                                                                                                                                                                         |
|---------------------------|-----------------------------------------------------------------------------------------------------------------------------------------------------------------------------------------------------------------------------------------|
| Instrument                | The data were collected using a BD FACSverse (BD Biosciences). For the isolation of the dendritic cells for culture, either a SH800S cell sorter (Sony biotechnology, San Jose, CA, USA) or a FACS Aria III (BD Biosciences) was used.. |
| Software                  | The data were analyzed using BD FACSuite™ Software (BD Biosciences).                                                                                                                                                                    |
| Cell population abundance | The purity of sorted dendritic cells (DCs) was 80%, as determined by reanalyzing the sorted samples.                                                                                                                                    |
| Gating strategy           | The gating strategy for DCs was: CD45+ LY6G- F4/80- CD11b+ CD11c+.                                                                                                                                                                      |

Tick this box to confirm that a figure exemplifying the gating strategy is provided in the Supplementary Information.

## Magnetic resonance imaging

### Experimental design

|                                 |     |
|---------------------------------|-----|
| Design type                     | n/a |
| Design specifications           | n/a |
| Behavioral performance measures | n/a |

### Acquisition

|                               |                                                                 |
|-------------------------------|-----------------------------------------------------------------|
| Imaging type(s)               | n/a                                                             |
| Field strength                | n/a                                                             |
| Sequence & imaging parameters | n/a                                                             |
| Area of acquisition           | n/a                                                             |
| Diffusion MRI                 | <input type="checkbox"/> Used <input type="checkbox"/> Not used |

### Preprocessing

|                            |     |
|----------------------------|-----|
| Preprocessing software     | n/a |
| Normalization              | n/a |
| Normalization template     | n/a |
| Noise and artifact removal | n/a |
| Volume censoring           | n/a |

### Statistical modeling & inference

|                                           |                                                                                                       |
|-------------------------------------------|-------------------------------------------------------------------------------------------------------|
| Model type and settings                   | n/a                                                                                                   |
| Effect(s) tested                          | n/a                                                                                                   |
| Specify type of analysis:                 | <input type="checkbox"/> Whole brain <input type="checkbox"/> ROI-based <input type="checkbox"/> Both |
| Statistic type for inference              | n/a                                                                                                   |
| (See <a href="#">Eklund et al. 2016</a> ) |                                                                                                       |
| Correction                                | n/a                                                                                                   |

### Models & analysis

|                          |                                                                       |
|--------------------------|-----------------------------------------------------------------------|
| n/a                      | Involvement in the study                                              |
| <input type="checkbox"/> | <input type="checkbox"/> Functional and/or effective connectivity     |
| <input type="checkbox"/> | <input type="checkbox"/> Graph analysis                               |
| <input type="checkbox"/> | <input type="checkbox"/> Multivariate modeling or predictive analysis |



Functional and/or effective connectivity

n/a

Graph analysis

n/a

Multivariate modeling and predictive analysis

n/a
